# Supplementary material for: A conformational switch in initiation factor 2 controls the fidelity of translation initiation in bacteria
Source: PubMed Central journal article supplement (PMC5684235; doi:10.1038/s41467-017-01492-6), 2017-11-14
Supplement: 41467_2017_1492_MOESM1_ESM.pdf [file 41467_2017_1492_MOESM1_ESM.pdf]

1 **SUPPLEMENTARY INFORMATION**

2

3 **A conformational switch in initiation factor 2 controls the fidelity of**  
4 **translation initiation in bacteria**

5

6 Kelvin Caban<sup>1</sup>, Michael Pavlov<sup>2</sup>, Måns Ehrenberg<sup>2</sup>, and Ruben L. Gonzalez, Jr.<sup>1,\*</sup>

7

8 *<sup>1</sup>Department of Chemistry, Columbia University, 3000 Broadway, MC3126, New York, NY*  
9 *10027, USA*

10 *<sup>2</sup>Department of Cell and Molecular Biology, BMC, Uppsala University, Husargatan 3, Uppsala,*  
11 *Sweden 751 24*

12

13 \*To whom correspondence should be addressed: Ruben L. Gonzalez Jr., Department of  
14 Chemistry, Columbia University, 3000 Broadway, MC3126, New York, NY 10027, USA, Tel.:  
15 (212) 854-1096; Fax: (212) 932-1289; Email: [rlg2118@columbia.edu](mailto:rlg2118@columbia.edu)

16

17

18 **Supplementary Figures**

19

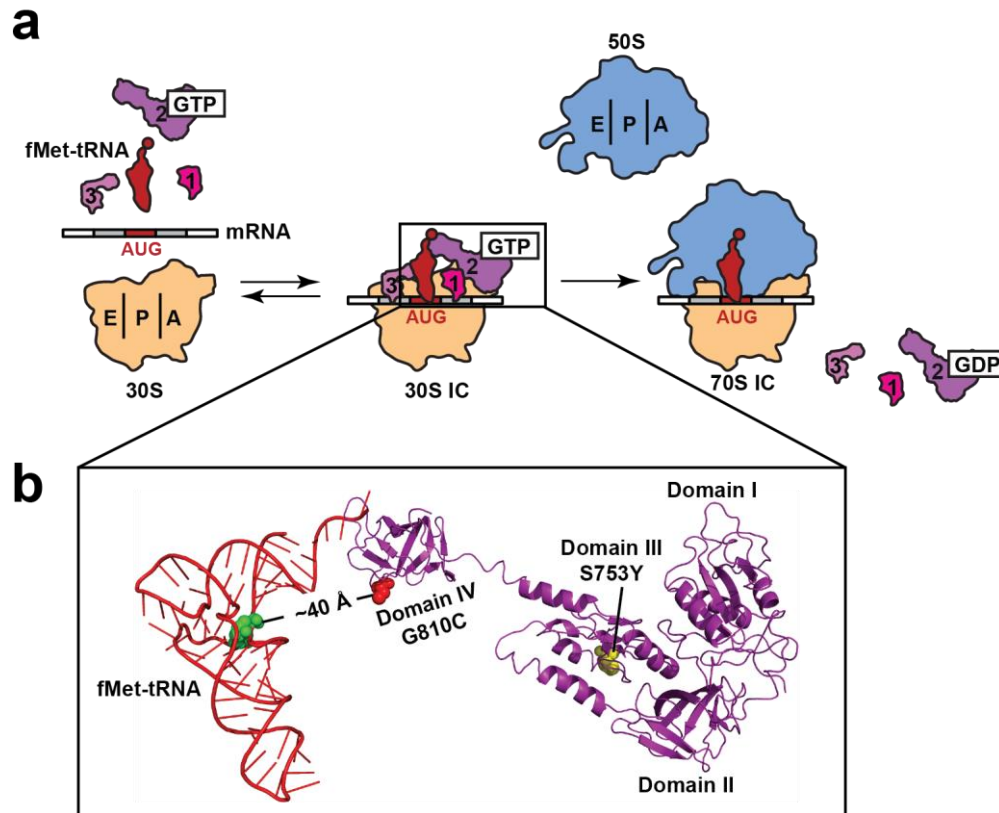

20

21

22 **Supplementary Figure 1: The bacterial translation initiation pathway.** (a) Cartoon  
 23 representation of the translation initiation pathway. Translation initiation begins with the  
 24 assembly of a 30S initiation complex (30S IC) consisting of the 30S ribosomal subunit, mRNA,  
 25 IFs 1-3, and initiator fMet-tRNA<sup>fMet</sup>. Joining of the 50S ribosomal subunit to the 30S IC and the  
 26 subsequent departure of the IFs gives rise to the elongation-competent 70S IC. (b) Structural  
 27 model of the IF2•tRNA sub-complex depicting the IF2-tRNA smFRET signal (pdb 1Z01). The  
 28 location of the S753Y mutation in domain III of IF2 is shown as yellow spheres. Red spheres  
 29 indicate the location of the Cy5 fluorophore appended to cysteine 810 in domain IV of IF2, and  
 30 green spheres indicate the location of the Cy3 fluorophore appended to the 4-thiouridine at  
 31 position 8 of fMet-tRNA<sup>fMet</sup>.

\*

|              |     |                                                                                                                         |
|--------------|-----|-------------------------------------------------------------------------------------------------------------------------|
| Escherichia  | 724 | G V G G I T E T D A T L A A A S N A I L V G F N V R A D A S A R K V I E A E S L D L R Y Y S V I Y N L I D E V K A A M S |
| Salmonella   | 726 | G V G G I T E T D A T L A A A S N A I L V G F N V R A D A S A R K V I E S E S L D L R Y Y S V I Y N L I D E V K A A M S |
| Klebsiella   | 730 | G V G G I T E T D A T L A A A S N A I L V G F N V R A D A S A R K V I E A E S L D L R Y Y S V I Y N L I D E V K A A M S |
| Cronobacter  | 737 | G V G G I T E T D A T L A A A S N A I L V G F N V R A D A S A R R V I E A E S L D L R Y Y S V I Y N L I D E V K A A M S |
| Yersinia     | 726 | G V G G I T E T D A T L A A A S G A I I L G F N V R A D A S A R R V E T E G L D L R Y Y S V I Y S L I D E V K Q A M S   |
| Serratia     | 729 | G V G G I T E T D A T L A A A S N A I I L G F N V R A D A S A R R V I E A E S L D L R Y Y S V I Y N L I D E V K Q A M S |
| Shigella     | 724 | G V G G I T E T D A T L A A A S N A I L V G F N V R A D A S A R K V I E A E S L D L R Y Y S V I Y N L I D E V K A A M S |
| Enterobacter | 730 | G V G G I T E T D A T L A A A S N A I L V G F N V R A D A S A R K V I E S E S L D L R Y Y S V I Y N L I D E V K A A M S |
| Pseudomonas  | 675 | G V G G I T E S D A N L A L A S N A V L F G F N V R A D A G A R K I V E A E G L D M R Y Y N V I Y D I I E D V K K A L T |
| Thermus      | 408 | Q V G A P T E S D V L L A Q T A N A A I L A F G V N P P G S V K K A E E K G V L L K T E R T I Y D L V D E V R N M V K   |
| Geobacillus  | 577 | A V G A I T E S D I S L A T A S N A I V I G F N V R P D A N A K R A A E S E K V D I R L H R T I Y N V I E E I E A A M K |

32

33

34 **Supplementary Figure 2: Multiple sequence alignment of IF2.** Multiple bacterial IF2 amino  
 35 acid sequences were aligned using the T-coffee method<sup>1</sup> and shaded with BOXSHADE.  
 36 Identical amino acids are shaded black and conservative substitutions are shaded gray. The  
 37 asterisk indicates the serine in *E. coli* IF2 (S753) homologous to *S. typhimurium* IF2 S755.

38

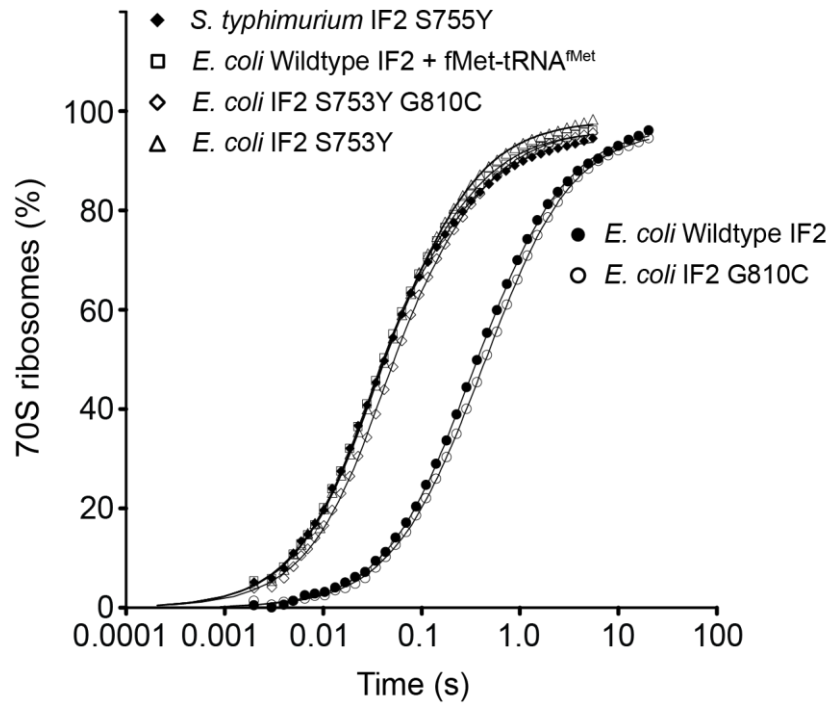

39

40

41 **Supplementary Figure 3: Ensemble rapid kinetic studies of 50S subunit joining.** The  
 42 ensemble kinetics of 70S IC formation was determined after rapid mixing of 50S subunits and  
 43 pseudo 30S ICs lacking fMet-tRNA<sup>fMet</sup>, but carrying IF1 and the IF2 variants indicated. Rapid  
 44 mixing of 50S subunits to 30S ICs assembled with *E. coli* wtIF2 and fMet-tRNA<sup>fMet</sup> was  
 45 performed as a positive control.

46

|                           |   |   |   |   |   |   |   |   |   |   |   |   |
|---------------------------|---|---|---|---|---|---|---|---|---|---|---|---|
| IF2 S753Y/G810C           | - | - | - | - | - | - | - | - | - | - | + | + |
| IF2 S753Y                 | - | - | - | - | - | - | - | - | + | + | - | - |
| IF2 G810C                 | - | - | - | - | - | - | + | + | - | - | - | - |
| Wildtype IF2              | - | - | - | - | + | + | - | - | - | - | - | - |
| Met-tRNA <sup>fMet</sup>  | - | - | - | - | - | + | - | + | + | + | + | + |
| fMet-tRNA <sup>fMet</sup> | - | - | + | + | + | - | + | - | + | - | + | - |
| tRNA <sup>Phe</sup>       | - | + | - | + | + | + | + | + | + | + | + | + |
| Ribosomes                 | - | + | + | + | + | + | + | + | + | + | + | + |

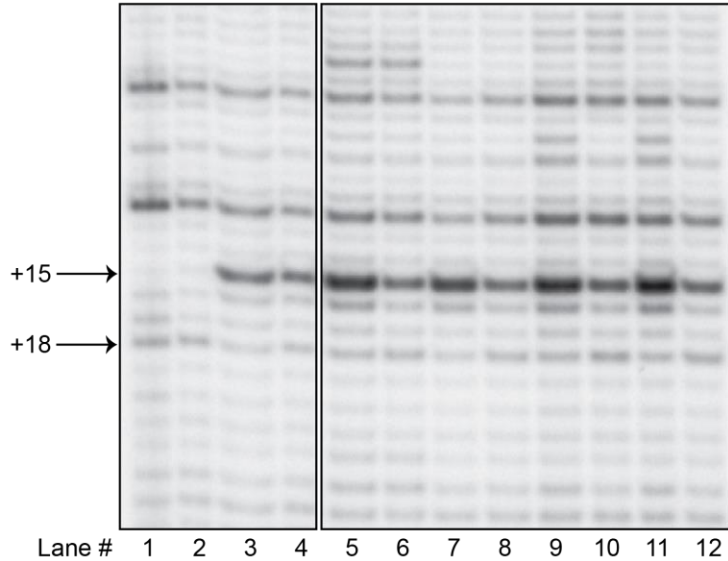

47

48

49 **Supplementary Figure 4: Primer-extension inhibition, or “toeprinting”, analyses of 30S**

50 **ICs assembled on mRNA<sub>pri-ext</sub>.** The +15 band indicates that 30S subunits contain either Met-

51 tRNA<sup>fMet</sup> or fMet-tRNA<sup>fMet</sup> in the P site and the +18 band indicates that 30S subunits have

52 tRNA<sup>Phe</sup> in the P site. Reactions were performed in the absence (lanes 1-4) or the presence of

53 the indicated IF2 variants (lanes 5-12). Lane 1 is a control reaction lacking ribosomes.

54 Reactions performed in the absence of IF2 contained either tRNA<sup>Phe</sup> (lane 2), fMet-tRNA<sup>fMet</sup>

55 (lane 3) or equimolar amounts of tRNA<sup>Phe</sup> and fMet-tRNA<sup>fMet</sup> (lane 4). Reactions performed in

56 the presence of the indicated IF2 variant contained either equimolar amounts of tRNA<sup>Phe</sup> and

57 fMet-tRNA<sup>fMet</sup> (lanes 5,7,9, and 11) or equimolar amounts of tRNA<sup>Phe</sup> and Met-tRNA<sup>fMet</sup> (lanes 6,

58 8, 10 and 12). All lanes were derived from the same 9% denaturing polyacrylamide gel.

59

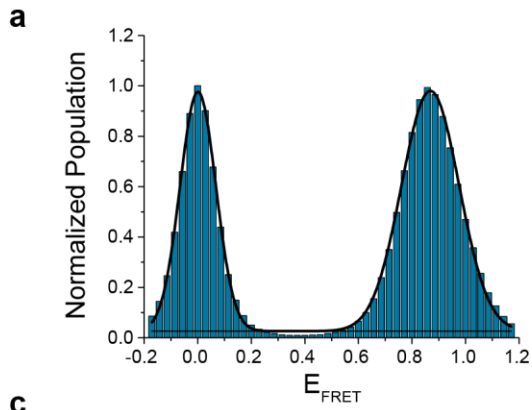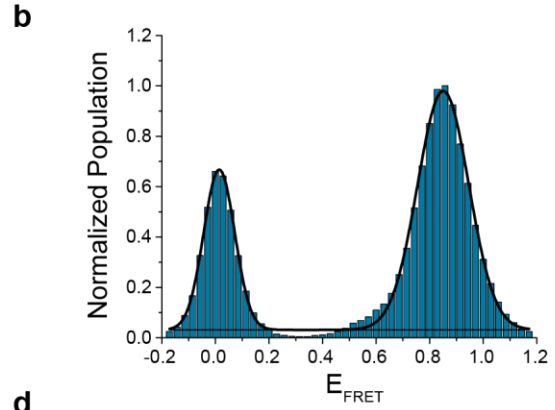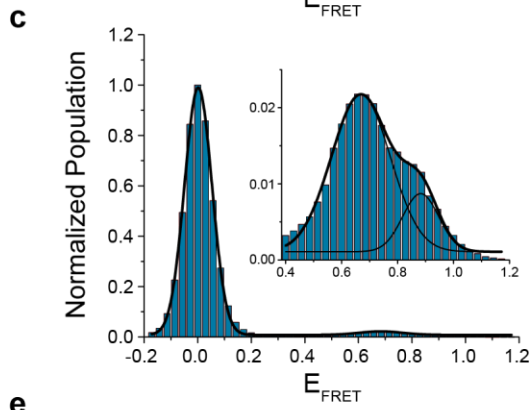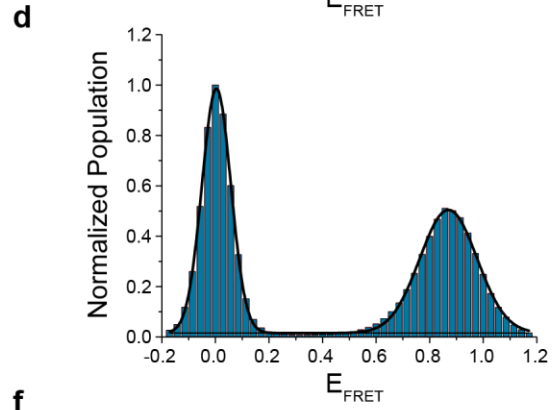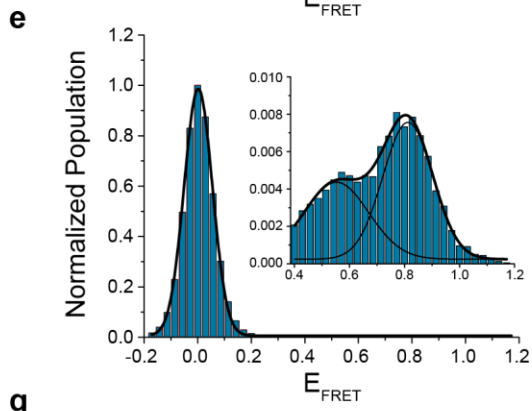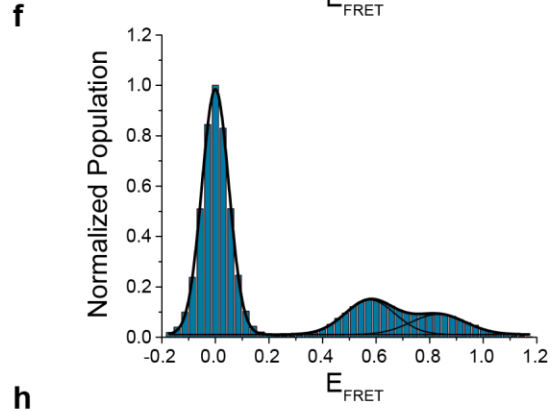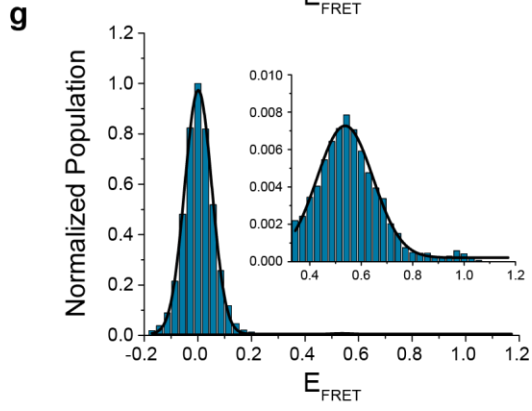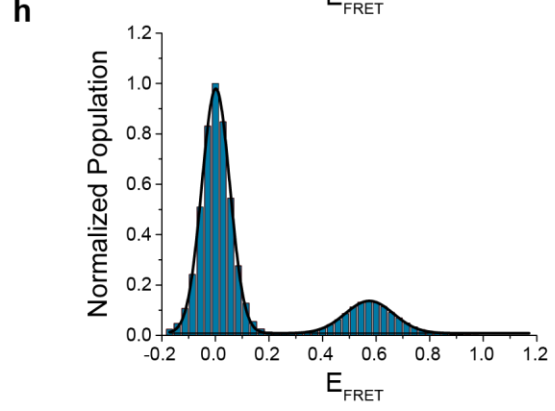

61 **Supplementary Figure 5: Normalized one-dimensional  $E_{\text{FRET}}$  histograms.** Normalized one-  
62 dimensional  $E_{\text{FRET}}$  histograms for smFRET experiments reporting on the interaction of: (a)  
63 wtIF2[Cy5]<sub>div</sub>(GTP) with 30S IC<sub>wT</sub>, (b) mutIF2[Cy5]<sub>div</sub>(GTP) with 30S IC<sub>mT</sub>, (c)  
64 wtIF2[Cy5]<sub>div</sub>(GDP) with 30S IC<sub>wD</sub>, (d) mutIF2[Cy5]<sub>div</sub>(GDP) with 30S IC<sub>mD</sub>, (e) wtIF2[Cy5]<sub>div</sub> with  
65 30S IC<sub>wT,Met</sub>, (f) mutIF2[Cy5]<sub>div</sub> with 30S IC<sub>mT,Met</sub>, (g) wtIF2[Cy5]<sub>div</sub> with 30S IC<sub>wT,OH</sub>, and (h)  
66 mutIF2[Cy5]<sub>div</sub> with 30S IC<sub>mT,OH</sub>. For the purposes of constructing the plots presented here,  
67  $E_{\text{FRET}}$  histograms were generated using all of the data points prior to Cy5 photobleaching from  
68 the entire collection of raw  $E_{\text{FRET}}$  trajectories obtained from three independent replicates of each  
69 experiment. The  $E_{\text{FRET}}$  range from -0.2 to 1.2 was separated into 50 equally spaced bins and  
70 the histograms were normalized to the most populated bin. The resulting  $E_{\text{FRET}}$  histograms were  
71 fitted with multiple Gaussian distribution functions (black lines) using Origin 8.0 (Origin Lab  
72 Corp.). The insets in panels c, e, and g highlight the relatively small populations of  $E_{\text{FRET}}$  values  
73 corresponding to the non-zero FRET states that are observed in the larger histograms of the full  
74 populations of  $E_{\text{FRET}}$  values corresponding to all of the FRET states that are shown in the main  
75 panels c, e, and g. To generate the histograms shown in the insets, the small populations of  
76  $E_{\text{FRET}}$  values corresponding to the non-zero FRET states were plotted independently of the  
77 relatively larger populations of  $E_{\text{FRET}}$  values corresponding to the zero FRET states. For the  
78 purposes of calculating the non-zero  $E_{\text{FRET}}$  values reported in the main text of the article and in  
79 Supplementary Table 1, Gaussian distribution functions were fit to the three  $E_{\text{FRET}}$  histograms  
80 corresponding to the three independent replicates of each experiment and the mean non-zero  
81  $E_{\text{FRET}}$  values and standard deviations of the mean non-zero  $E_{\text{FRET}}$  values for each experiment  
82 were determined from the three fits. To evaluate the statistical significance of the differences  
83 between the mean non-zero  $E_{\text{FRET}}$  values that are reported in the main text of the article, paired  
84  $t$  tests were carried out using Origin 8.0.

85

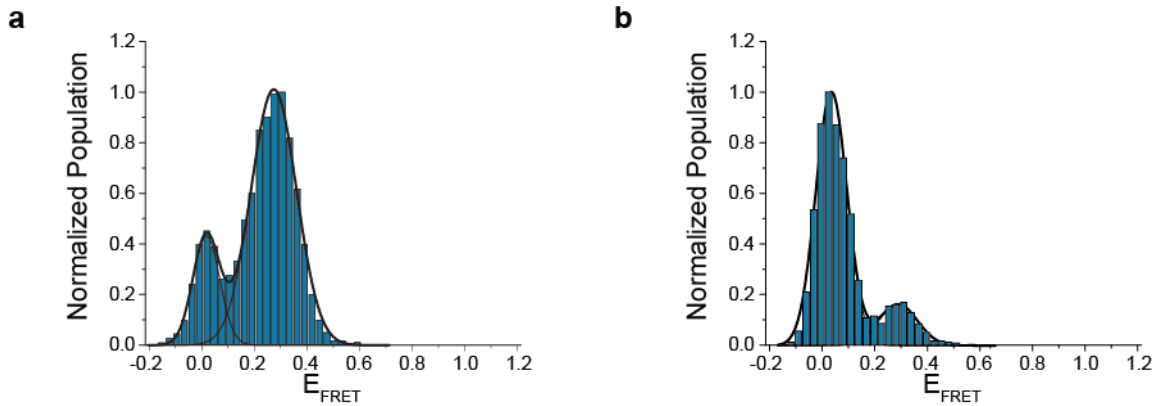

86

87

88 **Supplementary Figure 6: Normalized one-dimensional  $E_{\text{FRET}}$  histograms.** Normalized one-

89 dimensional  $E_{\text{FRET}}$  histograms for smFRET experiments reporting on the interaction of: (a)

90 wtIF2[Cy5]<sub>dIII</sub>(GTP) with 30S IC<sub>WT</sub> and (b) wtIF2[Cy5]<sub>dIII</sub>(GDP) with 30S IC<sub>WD</sub>. For the purposes of

91 constructing the plots presented here,  $E_{\text{FRET}}$  histograms were generated as described in

92 Supplementary Figure 5, with the exception that the raw  $E_{\text{FRET}}$  trajectories were obtained from a

93 single run of each experiment. For the purposes of calculating the non-zero  $E_{\text{FRET}}$  values

94 reported in the main text of the article, Gaussian distribution functions were fit to the  $E_{\text{FRET}}$

95 histogram corresponding to each experiment and the mean non-zero  $E_{\text{FRET}}$  value was

96 determined from the fit.

97



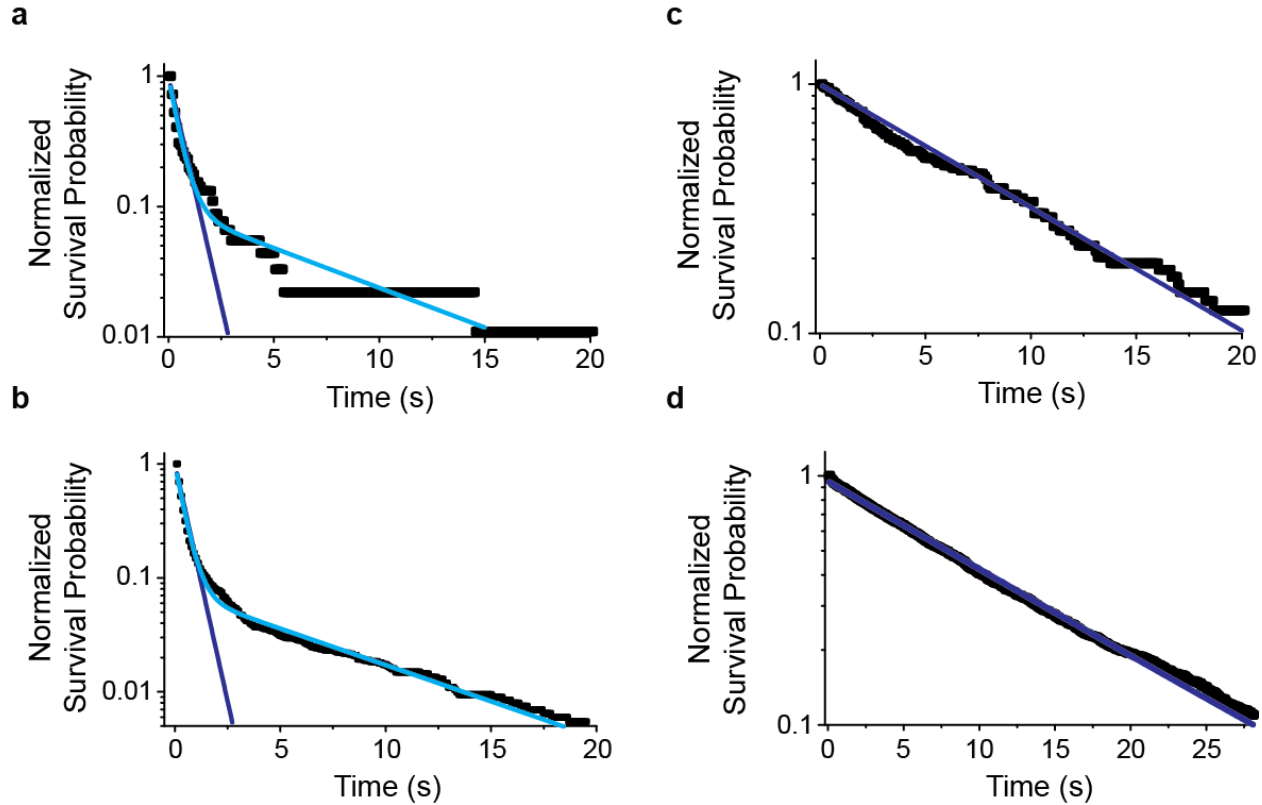

98

99

100 **Supplementary Figure 7: Normalized survival probability plots of the wtIF2-bound state**

101 **of the 30S IC.** The entire collection of  $E_{\text{FRET}}$  trajectories obtained from smFRET experiments  
 102 investigating the interaction of (a) wtIF2[Cy5]<sub>dIII</sub>(GDP) with 30S IC<sub>wD</sub>, (b) wtIF2[Cy5]<sub>dIV</sub>(GDP) with  
 103 30S IC<sub>wD</sub>, (c) wtIF2[Cy5]<sub>dIII</sub>(GTP) with 30S IC<sub>wT</sub>, (d) wtIF2[Cy5]<sub>dIV</sub>(GTP) with 30S IC<sub>wT</sub>, were first  
 104 idealized to a hidden Markov model (HMM) using the vbFRET software package<sup>2</sup>. To separate  
 105 dwells in the zero FRET-, wtIF2-free state of the 30S IC (hereafter referred to as the wtIF2-free  
 106 state) and the non-zero FRET-, wtIF2-bound state of the 30S IC (hereafter referred to as the  
 107 wtIF2-bound state), a threshold of  $E_{\text{FRET}} = 0.2$  was applied to each of the idealized  $E_{\text{FRET}}$   
 108 trajectories and the dwell times in the wtIF2-bound state prior to transitioning into the wtIF2-free  
 109 state were used to construct normalized survival probability plots<sup>3</sup> using OriginPro 8 (Origin Lab  
 110 Corp.). To obtain the fractional occupancies and survival times of the wtIF2-bound state, the  
 111 normalized survival probability plots were fit with a single-exponential decay function of the form

112  $y = F \cdot \exp(-x/\tau)$  (purple line), where  $F$  is the fractional occupancy, equal to 100 % in the single-  
113 exponential decay case, and  $\tau$  is the survival time of the wtIF2-bound state. If necessary, the  
114 normalized survival probability plots were fit with a double-exponential decay function of the  
115 form  $y = F_1 \cdot \exp(-x/\tau_1) + (1-F_1) \cdot \exp(-x/\tau_2)$  (light blue line), where  $F_1$  and  $\tau_1$  are the fractional  
116 occupancy and survival time, respectively, of the first sub-population of the wtIF2-bound state  
117 and  $(1-F_1)$  and  $\tau_2$  are the fractional occupancy and survival time, respectively, of the second  
118 sub-population of the wtIF2-bound state. The normalized survival probability plot of the  
119 wtIF2[Cy5]<sub>dIII</sub>(GDP)-bound state is best described by a double-exponential decay in which the  
120 minor sub-population exhibits a fractional occupancy of 9.7% and a survival time longer than the  
121 that of the fluorophores prior to photobleaching (~7.1 s in these experiments) and the major  
122 sub-population exhibits a fractional occupancy of 90.3% and a survival time of 0.46 s. This is in  
123 excellent agreement with the normalized survival probability plot of the wtIF2[Cy5]<sub>dIV</sub>(GDP)-  
124 bound state, which is best described by a double-exponential decay in which the minor sub-  
125 population exhibits a fractional occupancy of 7.5% and a survival time longer than that of the  
126 fluorophores prior to photobleaching (~6.8 s in these experiments), and the major sub-  
127 population exhibits a fractional occupancy of 92.5% and a survival time of 0.42 s. In contrast,  
128 the survival probability plots of the wtIF2[Cy5]<sub>dIII</sub>(GTP)-bound state and the wtIF2[Cy5]<sub>dIV</sub>(GTP)-  
129 bound state are both best described by single-exponential decays with survival times longer  
130 than the those of the fluorophores prior to photobleaching (~8.8 s and ~11.8 s, respectively, in  
131 these experiments). Collectively, these data demonstrate that the wtIF2(GDP)-bound state  
132 observed using either wtIF2[Cy5]<sub>dIII</sub> or wtIF2[Cy5]<sub>dIV</sub> consists of two sub-populations, and that  
133 the kinetic properties of the two sub-populations corresponding to wtIF2[Cy5]<sub>dIII</sub> are  
134 indistinguishable from the kinetic properties of the two sub-populations corresponding to  
135 wtIF2[Cy5]<sub>dIV</sub>.  
136

137 **Supplementary Tables**138 **Supplementary Table 1:** The non-zero mean  $E_{\text{FRET}}$  values, estimated distances between our

139 fluorophore labeling positions, and sub-population occupancies of 30S IC-bound IF2.

140

| <b>30S IC</b>                  | <b>IF2</b> | <b>Nucleotide</b> | $E_{\text{FRET}}^{\text{a}}$ | Distance (Å) <sup>b</sup> | Occupancy (%) <sup>c</sup> |
|--------------------------------|------------|-------------------|------------------------------|---------------------------|----------------------------|
| <b>30S IC<sub>WT</sub></b>     | wtIF2      | GTP               | 0.87 ± 0.02                  | ~40                       | 100                        |
| <b>30S IC<sub>mT</sub></b>     | mutIF2     | GTP               | 0.85 ± 0.01                  | ~41                       | 100                        |
| <b>30S IC<sub>WD</sub></b>     | wtIF2      | GDP               | 0.67 ± 0.01                  | ~49                       | 82 ± 1.5                   |
|                                |            |                   | 0.89 ± 0.01                  | ~39                       | 18 ± 1.5                   |
| <b>30S IC<sub>mD</sub></b>     | mutIF2     | GDP               | 0.86 ± 0.03                  | ~41                       | 100                        |
| <b>30S IC<sub>WT,Met</sub></b> | wtIF2      | GTP               | 0.55 ± 0.01                  | ~53                       | 44 ± 12                    |
|                                |            |                   | 0.81 ± 0.01                  | ~43                       | 56 ± 12                    |
| <b>30S IC<sub>mT,Met</sub></b> | mutIF2     | GTP               | 0.57 ± 0.02                  | ~52                       | 58 ± 6                     |
|                                |            |                   | 0.83 ± 0.04                  | ~42                       | 42 ± 6                     |
| <b>30S IC<sub>WT,OH</sub></b>  | wtIF2      | GTP               | 0.53 ± 0.02                  | ~54                       | 100                        |
| <b>30S IC<sub>mT,OH</sub></b>  | mutIF2     | GTP               | 0.57 ± 0.01                  | ~52                       | 100                        |

141

142 <sup>a</sup> Non-zero  $E_{\text{FRET}}$  values were determined from three independently collected datasets (mean ±143 SD) and represent the center of the Gaussian function fitted to the  $E_{\text{FRET}}$  histograms.

144 <sup>b</sup> The estimated distances between our fluorophore labeling positions were calculated using the  
145 equation  $E_{\text{FRET}} = 1 / (1 + (R/R_0)^6)$  and assuming an  $R_0$  value of 55 Å for the Cy3-Cy5 FRET  
146 pair<sup>4</sup>.

147 <sup>c</sup> The sub-population occupancies were determined from three independently collected  
148 datasets (mean  $\pm$  SD) and represent the normalized area of the Gaussian functions that were  
149 fitted to the  $E_{\text{FRET}}$  histograms.

150

151 **Supplementary Table 2:** The estimated occupancies of 30S IC-bound IF2 in our previously  
152 published ensemble rapid kinetic studies of 50S subunit joining<sup>5</sup>.

153

154

155

| <b>Complex</b>                 | <b>IF2</b> | <b>Nucleotide</b> | <b>Occupancy (%)<sup>a</sup></b> |
|--------------------------------|------------|-------------------|----------------------------------|
| <b>30S IC<sub>WT</sub></b>     | wtIF2      | GTP               | 93.5                             |
| <b>30S IC<sub>mT</sub></b>     | mutIF2     | GTP               | 98                               |
| <b>30S IC<sub>WD</sub></b>     | wtIF2      | GDP               | 43                               |
| <b>30S IC<sub>mD</sub></b>     | mutIF2     | GDP               | 78                               |
| <b>30S IC<sub>WT,Met</sub></b> | wtIF2      | GTP               | 19                               |
| <b>30S IC<sub>mT,Met</sub></b> | mutIF2     | GTP               | 73                               |
| <b>30S IC<sub>WT,OH</sub></b>  | wtIF2      | GTP               | 9                                |
| <b>30S IC<sub>mT,OH</sub></b>  | mutIF2     | GTP               | 67                               |

161

162

163

164

165

166

167

168

169 <sup>a</sup> Occupancy (%) = ([IF2•30S] / [30S]) × 100. [IF2•30S] was calculated by applying the quadratic  
170 binding equation using the equilibrium dissociation constants reported in Table 1 and the  
171 concentrations of IF2 and 30S subunits used in our previous ensemble rapid kinetic studies of  
172 subunit joining (0.6 μM and 0.32 μM, respectively)<sup>5</sup>.

173

174 **References**

- 175 1. Notredame, C., Higgins, D. G. & Heringa, J. T-Coffee: A novel method for fast and  
176 accurate multiple sequence alignment. *J Mol Biol* **302**, 205–217 (2000).
- 177 2. Bronson, J. E., Fei, J., Hofman, J. M., Gonzalez, R. L. & Wiggins, C. H. Learning rates  
178 and states from biophysical time series: a Bayesian approach to model selection and  
179 single-molecule FRET data. *Biophys J* **97**, 3196–3205 (2009).
- 180 3. MacDougall, D. D. & Gonzalez, R. L. Translation initiation factor 3 regulates switching  
181 between different modes of ribosomal subunit joining. *J Mol Biol* **427**, 1801–1818 (2015).
- 182 4. Murphy, M. C., Rasnik, I., Cheng, W., Lohman, T. M. & Ha, T. Probing single-stranded  
183 DNA conformational flexibility using fluorescence spectroscopy. *Biophys J* **86**, 2530–2537  
184 (2004).
- 185 5. Pavlov, M. Y., Zorzet, A., Andersson, D. I. & Ehrenberg, M. Activation of initiation factor 2  
186 by ligands and mutations for rapid docking of ribosomal subunits. *EMBO J.* **30**, 289–301  
187 (2011).
- 188
